# Supplementary material for: Reliability Analysis and Applications of Generalized Type-II Progressively Hybrid Maxwell–Boltzmann Censored Data
Source: MDPI journal article supplement (doi:10.3390/axioms12070618), 2023-06-21
Supplement: s1 [file s1]

## Supplementary Materials

### Reliability Analysis and Applications of Generalized Type-II Progressively Hybrid Maxwell–Boltzmann Censored Data

Ahmed Elshahhat<sup>1\*</sup>, Osama E. Abo-Kasem<sup>2</sup> and Heba S. Mohammed<sup>3</sup>

<sup>1</sup>Faculty of Technology and Development, Zagazig University, Zagazig 44519, Egypt

<sup>2</sup>Department of Statistics, Faculty of Commerce, Zagazig University, Zagazig 44519, Egypt

<sup>3</sup>Department of Mathematical Sciences, College of Science, Princess Nourah bint Abdulrahman University,  
P.O. Box 84428, Riyadh 11671, Saudi Arabia

---

\*Email: aelshahhat@dtd.zu.edu.eg

Table S1: The Av.Es ( $1^{st}$  column), RMSEs ( $2^{nd}$  column) and MRABs ( $3^{rd}$  column) of  $\sigma$  when  $\sigma = 0.8$ .

| $(T_1, T_2)$<br>Prior $\rightarrow$ | $(n, m)$ | Scheme | MLE    |        |        | MCMC   |        |        |        |        |        |
|-------------------------------------|----------|--------|--------|--------|--------|--------|--------|--------|--------|--------|--------|
|                                     |          |        |        |        |        | P1     |        |        | P2     |        |        |
| (0.5,1)                             | (40,20)  | S1     | 0.8491 | 0.2343 | 0.2166 | 0.9588 | 0.1852 | 0.2126 | 0.9079 | 0.1222 | 0.1390 |
|                                     |          | S2     | 0.9774 | 0.2028 | 0.2336 | 0.8232 | 0.1791 | 0.1759 | 0.9119 | 0.1294 | 0.1451 |
|                                     |          | S3     | 0.9995 | 0.2254 | 0.2601 | 0.8135 | 0.1571 | 0.1596 | 0.9297 | 0.1489 | 0.1671 |
|                                     |          | S4     | 0.9811 | 0.2053 | 0.2346 | 0.8261 | 0.1755 | 0.1733 | 0.8834 | 0.0947 | 0.1078 |
|                                     | (40,32)  | S1     | 0.8300 | 0.1725 | 0.1634 | 0.9138 | 0.1376 | 0.1592 | 0.8937 | 0.1079 | 0.1220 |
|                                     |          | S2     | 0.9786 | 0.1878 | 0.2033 | 0.8201 | 0.1515 | 0.1474 | 0.8986 | 0.1174 | 0.1294 |
|                                     |          | S3     | 0.9411 | 0.1657 | 0.1919 | 0.8252 | 0.1553 | 0.1503 | 0.9227 | 0.1375 | 0.1392 |
|                                     |          | S4     | 0.8251 | 0.1643 | 0.1571 | 0.9273 | 0.1500 | 0.1689 | 0.8732 | 0.0841 | 0.0952 |
|                                     | (80,40)  | S1     | 0.8198 | 0.1383 | 0.1447 | 0.8237 | 0.1211 | 0.1309 | 0.8733 | 0.0757 | 0.0916 |
|                                     |          | S2     | 0.8458 | 0.1205 | 0.1312 | 0.8086 | 0.1169 | 0.1168 | 0.8830 | 0.0888 | 0.1038 |
|                                     |          | S3     | 0.8411 | 0.1243 | 0.1347 | 0.9205 | 0.1214 | 0.1506 | 0.8129 | 0.1142 | 0.1125 |
|                                     |          | S4     | 0.8093 | 0.1123 | 0.1308 | 0.8179 | 0.1087 | 0.1174 | 0.8751 | 0.0768 | 0.0938 |
|                                     | (80,64)  | S1     | 0.8164 | 0.1239 | 0.1312 | 0.8515 | 0.1128 | 0.1233 | 0.8624 | 0.0659 | 0.0781 |
|                                     |          | S2     | 0.8740 | 0.1181 | 0.1277 | 0.8113 | 0.1025 | 0.1065 | 0.8852 | 0.0867 | 0.1013 |
|                                     |          | S3     | 0.8534 | 0.1215 | 0.1304 | 0.8149 | 0.1058 | 0.1110 | 0.8888 | 0.0935 | 0.1034 |
|                                     |          | S4     | 0.8143 | 0.1086 | 0.1121 | 0.8465 | 0.1025 | 0.1064 | 0.8564 | 0.0582 | 0.0705 |
| (1.5,2)                             | (40,20)  | S1     | 0.9758 | 0.1999 | 0.2301 | 0.8162 | 0.1629 | 0.1583 | 0.8964 | 0.1102 | 0.1247 |
|                                     |          | S2     | 1.0282 | 0.2499 | 0.2888 | 0.8115 | 0.1509 | 0.1481 | 0.9114 | 0.1287 | 0.1341 |
|                                     |          | S3     | 1.0029 | 0.2277 | 0.2630 | 0.8218 | 0.1641 | 0.1574 | 0.9225 | 0.1421 | 0.1459 |
|                                     |          | S4     | 0.9650 | 0.1865 | 0.2145 | 0.8091 | 0.1554 | 0.1508 | 0.9000 | 0.1079 | 0.1250 |
|                                     | (40,32)  | S1     | 0.9199 | 0.1411 | 0.1634 | 0.8157 | 0.1311 | 0.1386 | 0.8947 | 0.1088 | 0.1204 |
|                                     |          | S2     | 0.9472 | 0.1674 | 0.1940 | 0.8124 | 0.1326 | 0.1306 | 0.9074 | 0.1251 | 0.1240 |
|                                     |          | S3     | 0.8271 | 0.1489 | 0.1744 | 0.9169 | 0.1411 | 0.1425 | 0.9172 | 0.1372 | 0.1316 |
|                                     |          | S4     | 0.8232 | 0.1470 | 0.1844 | 0.9115 | 0.1322 | 0.1530 | 0.8796 | 0.0906 | 0.1030 |
|                                     | (80,40)  | S1     | 0.8317 | 0.1162 | 0.1258 | 0.8064 | 0.1100 | 0.1219 | 0.8907 | 0.0927 | 0.1134 |
|                                     |          | S2     | 0.8681 | 0.1159 | 0.1260 | 0.9117 | 0.1141 | 0.1169 | 0.8039 | 0.1030 | 0.1088 |
|                                     |          | S3     | 0.8295 | 0.1239 | 0.1351 | 0.9225 | 0.1154 | 0.1280 | 0.8088 | 0.1078 | 0.1056 |
|                                     |          | S4     | 0.8886 | 0.1257 | 0.1479 | 0.8043 | 0.0994 | 0.1023 | 0.8740 | 0.0756 | 0.0925 |
|                                     | (80,64)  | S1     | 0.8403 | 0.1086 | 0.1171 | 0.8073 | 0.0886 | 0.1049 | 0.8711 | 0.0739 | 0.0889 |
|                                     |          | S2     | 0.8777 | 0.1190 | 0.1279 | 0.8061 | 0.0864 | 0.1016 | 0.8754 | 0.0802 | 0.0943 |
|                                     |          | S3     | 0.8398 | 0.1204 | 0.1297 | 0.8125 | 0.0983 | 0.0961 | 0.8703 | 0.0784 | 0.0879 |
|                                     |          | S4     | 0.8393 | 0.1036 | 0.1125 | 0.8108 | 0.0974 | 0.0958 | 0.8548 | 0.0567 | 0.0685 |

Table S2: The Av.Es ( $1^{st}$  column), RMSEs ( $2^{nd}$  column) and MRABs ( $3^{rd}$  column) of  $\sigma$  when  $\sigma = 1.5$ .

| $(T_1, T_2)$<br>Prior $\rightarrow$ | $(n, m)$ | Scheme | MLE    |        |        | MCMC   |        |        |        |        |        |
|-------------------------------------|----------|--------|--------|--------|--------|--------|--------|--------|--------|--------|--------|
|                                     |          |        |        |        |        | P1     |        |        | P2     |        |        |
| (0.5,1)                             | (40,20)  | S1     | 1.6581 | 0.6614 | 0.2842 | 1.6838 | 0.2200 | 0.1315 | 1.6040 | 0.1186 | 0.0719 |
|                                     |          | S2     | 1.5840 | 0.4621 | 0.2232 | 1.6847 | 0.2188 | 0.1316 | 1.6294 | 0.1476 | 0.0895 |
|                                     |          | S3     | 1.6114 | 0.4490 | 0.2119 | 1.6902 | 0.2254 | 0.1352 | 1.6440 | 0.1642 | 0.0996 |
|                                     |          | S4     | 1.5996 | 0.4589 | 0.2220 | 1.6886 | 0.2236 | 0.1341 | 1.5793 | 0.1091 | 0.0878 |
|                                     | (40,32)  | S1     | 1.6135 | 0.5020 | 0.2242 | 1.6497 | 0.1834 | 0.1105 | 1.5803 | 0.0826 | 0.0535 |
|                                     |          | S2     | 1.5947 | 0.4040 | 0.1979 | 1.6446 | 0.1785 | 0.1077 | 1.5959 | 0.0986 | 0.0639 |
|                                     |          | S3     | 1.5959 | 0.4028 | 0.1972 | 1.5961 | 0.1353 | 0.1046 | 1.5895 | 0.1371 | 0.0866 |
|                                     |          | S4     | 1.5895 | 0.4214 | 0.2045 | 1.6637 | 0.1991 | 0.1196 | 1.5811 | 0.0925 | 0.0561 |
|                                     | (80,40)  | S1     | 1.5672 | 0.3652 | 0.1805 | 1.5386 | 0.1358 | 0.0817 | 1.5721 | 0.0746 | 0.0481 |
|                                     |          | S2     | 1.5287 | 0.2954 | 0.1578 | 1.5311 | 0.1499 | 0.0905 | 1.5822 | 0.0858 | 0.0548 |
|                                     |          | S3     | 1.5429 | 0.2796 | 0.1523 | 1.5311 | 0.1299 | 0.0805 | 1.6096 | 0.1127 | 0.0731 |
|                                     |          | S4     | 1.5415 | 0.2848 | 0.1453 | 1.5231 | 0.1370 | 0.0871 | 1.5641 | 0.0658 | 0.0427 |
|                                     | (80,64)  | S1     | 1.5705 | 0.3261 | 0.1613 | 1.5456 | 0.1234 | 0.0721 | 1.5356 | 0.0445 | 0.0257 |
|                                     |          | S2     | 1.5521 | 0.2668 | 0.1362 | 1.5538 | 0.1225 | 0.0723 | 1.5416 | 0.0530 | 0.0303 |
|                                     |          | S3     | 1.5523 | 0.2665 | 0.1361 | 1.5538 | 0.1225 | 0.0723 | 1.5366 | 0.0725 | 0.0415 |
|                                     |          | S4     | 1.5526 | 0.2702 | 0.1362 | 1.5526 | 0.1231 | 0.0725 | 1.5590 | 0.0608 | 0.0393 |
| (1.5,2)                             | (40,20)  | S1     | 1.5781 | 0.4000 | 0.2003 | 1.6876 | 0.2381 | 0.1495 | 1.6009 | 0.1544 | 0.0986 |
|                                     |          | S2     | 1.5393 | 0.3214 | 0.1689 | 1.6997 | 0.2342 | 0.1406 | 1.6233 | 0.1885 | 0.1085 |
|                                     |          | S3     | 1.4081 | 0.2865 | 0.1645 | 1.6959 | 0.2285 | 0.1380 | 1.6745 | 0.1921 | 0.1169 |
|                                     |          | S4     | 1.5336 | 0.3039 | 0.1570 | 1.6999 | 0.2333 | 0.1407 | 1.5800 | 0.1462 | 0.1026 |
|                                     | (40,32)  | S1     | 1.5447 | 0.2966 | 0.1511 | 1.6843 | 0.2173 | 0.1311 | 1.6051 | 0.1199 | 0.0727 |
|                                     |          | S2     | 1.5401 | 0.2763 | 0.1449 | 1.6662 | 0.1980 | 0.1197 | 1.6289 | 0.1468 | 0.0891 |
|                                     |          | S3     | 1.5454 | 0.2621 | 0.1344 | 1.6623 | 0.1929 | 0.1169 | 1.6317 | 0.1514 | 0.0914 |
|                                     |          | S4     | 1.5432 | 0.2861 | 0.1485 | 1.6806 | 0.2133 | 0.1286 | 1.5811 | 0.0925 | 0.0561 |
|                                     | (80,40)  | S1     | 1.5285 | 0.2406 | 0.1267 | 1.5216 | 0.1436 | 0.0908 | 1.5831 | 0.1085 | 0.0654 |
|                                     |          | S2     | 1.5151 | 0.2123 | 0.1126 | 1.5331 | 0.1402 | 0.0850 | 1.6069 | 0.1096 | 0.0713 |
|                                     |          | S3     | 1.5006 | 0.1814 | 0.0953 | 1.2662 | 0.1665 | 0.1056 | 1.6153 | 0.1183 | 0.0769 |
|                                     |          | S4     | 1.5126 | 0.2017 | 0.1058 | 1.5412 | 0.1530 | 0.0910 | 1.5681 | 0.0700 | 0.0484 |
|                                     | (80,64)  | S1     | 1.5258 | 0.1991 | 0.1042 | 1.5502 | 0.1219 | 0.0717 | 1.5809 | 0.0831 | 0.0539 |
|                                     |          | S2     | 1.5195 | 0.1805 | 0.0947 | 1.5458 | 0.1211 | 0.0710 | 1.5902 | 0.0932 | 0.0601 |
|                                     |          | S3     | 1.5213 | 0.1727 | 0.0902 | 1.5357 | 0.1193 | 0.0694 | 1.5986 | 0.1021 | 0.0657 |
|                                     |          | S4     | 1.5247 | 0.1942 | 0.1015 | 1.5456 | 0.1214 | 0.0711 | 1.5626 | 0.0643 | 0.0417 |

Table S3: The Av.Es ( $1^{st}$  column), RMSEs ( $2^{nd}$  column) and MRABs ( $3^{rd}$  column) of  $R(t)$  when  $\sigma = 0.8$ .

| $(T_1, T_2)$<br>Prior $\rightarrow$ | $(n, m)$ | Scheme | MLE    |        |        | MCMC   |        |        |        |        |        |
|-------------------------------------|----------|--------|--------|--------|--------|--------|--------|--------|--------|--------|--------|
|                                     |          |        |        |        |        | P1     |        |        | P2     |        |        |
| (0.5,1)                             | (40,20)  | S1     | 0.8891 | 0.0359 | 0.0354 | 0.9126 | 0.0259 | 0.0272 | 0.9070 | 0.0184 | 0.0190 |
|                                     |          | S2     | 0.8877 | 0.0316 | 0.0317 | 0.9148 | 0.0278 | 0.0292 | 0.9074 | 0.0192 | 0.0197 |
|                                     |          | S3     | 0.9172 | 0.0300 | 0.0266 | 0.8875 | 0.0283 | 0.0243 | 0.9096 | 0.0215 | 0.0221 |
|                                     |          | S4     | 0.8886 | 0.0305 | 0.0280 | 0.9153 | 0.0279 | 0.0291 | 0.9038 | 0.0148 | 0.0153 |
|                                     | (40,32)  | S1     | 0.8898 | 0.0284 | 0.0252 | 0.8911 | 0.0240 | 0.0217 | 0.9051 | 0.0165 | 0.0170 |
|                                     |          | S2     | 0.9151 | 0.0277 | 0.0291 | 0.8892 | 0.0263 | 0.0233 | 0.9056 | 0.0177 | 0.0178 |
|                                     |          | S3     | 0.8900 | 0.0260 | 0.0252 | 0.9106 | 0.0238 | 0.0233 | 0.9087 | 0.0208 | 0.0212 |
|                                     |          | S4     | 0.8894 | 0.0275 | 0.0245 | 0.9091 | 0.0220 | 0.0232 | 0.9023 | 0.0133 | 0.0137 |
|                                     | (80,40)  | S1     | 0.8900 | 0.0235 | 0.0211 | 0.9073 | 0.0205 | 0.0196 | 0.9026 | 0.0123 | 0.0134 |
|                                     |          | S2     | 0.8890 | 0.0211 | 0.0189 | 0.8955 | 0.0191 | 0.0181 | 0.9040 | 0.0138 | 0.0150 |
|                                     |          | S3     | 0.8900 | 0.0200 | 0.0194 | 0.9092 | 0.0188 | 0.0179 | 0.8970 | 0.0173 | 0.0174 |
|                                     |          | S4     | 0.8894 | 0.0201 | 0.0179 | 0.8908 | 0.0181 | 0.0174 | 0.9029 | 0.0124 | 0.0132 |
|                                     | (80,64)  | S1     | 0.8907 | 0.0194 | 0.0194 | 0.8970 | 0.0170 | 0.0165 | 0.9010 | 0.0108 | 0.0115 |
|                                     |          | S2     | 0.8903 | 0.0179 | 0.0182 | 0.9011 | 0.0173 | 0.0161 | 0.9043 | 0.0131 | 0.0145 |
|                                     |          | S3     | 0.8908 | 0.0180 | 0.0178 | 0.8945 | 0.0162 | 0.0172 | 0.9048 | 0.0147 | 0.0158 |
|                                     |          | S4     | 0.8906 | 0.0187 | 0.0168 | 0.8966 | 0.0176 | 0.0151 | 0.9001 | 0.0097 | 0.0105 |
| (1.5,2)                             | (40,20)  | S1     | 0.8874 | 0.0299 | 0.0257 | 0.9147 | 0.0274 | 0.0288 | 0.9052 | 0.0186 | 0.0181 |
|                                     |          | S2     | 0.9205 | 0.0324 | 0.0341 | 0.8873 | 0.0285 | 0.0244 | 0.9068 | 0.0197 | 0.0195 |
|                                     |          | S3     | 0.9176 | 0.0303 | 0.0319 | 0.8885 | 0.0293 | 0.0251 | 0.9080 | 0.0221 | 0.0211 |
|                                     |          | S4     | 0.8866 | 0.0289 | 0.0248 | 0.9137 | 0.0260 | 0.0273 | 0.9063 | 0.0165 | 0.0175 |
|                                     | (40,32)  | S1     | 0.8895 | 0.0234 | 0.0205 | 0.9082 | 0.0209 | 0.0221 | 0.9055 | 0.0168 | 0.0173 |
|                                     |          | S2     | 0.9117 | 0.0239 | 0.0253 | 0.8892 | 0.0228 | 0.0200 | 0.9074 | 0.0191 | 0.0191 |
|                                     |          | S3     | 0.8908 | 0.0248 | 0.0281 | 0.9077 | 0.0229 | 0.0221 | 0.9087 | 0.0207 | 0.0204 |
|                                     |          | S4     | 0.8901 | 0.0251 | 0.0225 | 0.9072 | 0.0198 | 0.0209 | 0.9032 | 0.0142 | 0.0147 |
|                                     | (80,40)  | S1     | 0.8931 | 0.0216 | 0.0201 | 0.8889 | 0.0200 | 0.0177 | 0.9052 | 0.0147 | 0.0162 |
|                                     |          | S2     | 0.8888 | 0.0190 | 0.0187 | 0.9080 | 0.0186 | 0.0176 | 0.9001 | 0.0183 | 0.0172 |
|                                     |          | S3     | 0.8923 | 0.0227 | 0.0215 | 0.9095 | 0.0191 | 0.0201 | 0.8895 | 0.0193 | 0.0170 |
|                                     |          | S4     | 0.8889 | 0.0190 | 0.0197 | 0.9045 | 0.0153 | 0.0156 | 0.9027 | 0.0123 | 0.0135 |
|                                     | (80,64)  | S1     | 0.8952 | 0.0186 | 0.0179 | 0.8901 | 0.0160 | 0.0142 | 0.9023 | 0.0120 | 0.0110 |
|                                     |          | S2     | 0.9017 | 0.0182 | 0.0180 | 0.8900 | 0.0156 | 0.0139 | 0.9029 | 0.0128 | 0.0117 |
|                                     |          | S3     | 0.8945 | 0.0209 | 0.0200 | 0.8907 | 0.0171 | 0.0152 | 0.9020 | 0.0125 | 0.0127 |
|                                     |          | S4     | 0.8952 | 0.0182 | 0.0174 | 0.8904 | 0.0172 | 0.0153 | 0.8998 | 0.0094 | 0.0103 |

Table S4: The Av.Es ( $1^{st}$  column), RMSEs ( $2^{nd}$  column) and MRABs ( $3^{rd}$  column) of  $R(t)$  when  $\sigma = 1.5$ .

| $(T_1, T_2)$<br>Prior $\rightarrow$ | $(n, m)$ | Scheme | MLE    |        |        | MCMC   |        |        |        |        |        |
|-------------------------------------|----------|--------|--------|--------|--------|--------|--------|--------|--------|--------|--------|
|                                     |          |        |        |        |        | P1     |        |        | P2     |        |        |
| (0.5,1)                             | (40,20)  | S1     | 0.9520 | 0.0209 | 0.0168 | 0.9548 | 0.0105 | 0.0105 | 0.9551 | 0.0085 | 0.0083 |
|                                     |          | S2     | 0.9518 | 0.0175 | 0.0142 | 0.9545 | 0.0155 | 0.0105 | 0.9554 | 0.0078 | 0.0088 |
|                                     |          | S3     | 0.9537 | 0.0151 | 0.0126 | 0.9545 | 0.0125 | 0.0102 | 0.9551 | 0.0097 | 0.0057 |
|                                     |          | S4     | 0.9527 | 0.0164 | 0.0137 | 0.9541 | 0.0116 | 0.0099 | 0.9568 | 0.0094 | 0.0047 |
|                                     | (40,32)  | S1     | 0.9531 | 0.0163 | 0.0135 | 0.9551 | 0.0093 | 0.0076 | 0.9577 | 0.0076 | 0.0053 |
|                                     |          | S2     | 0.9535 | 0.0150 | 0.0123 | 0.9555 | 0.0101 | 0.0076 | 0.9586 | 0.0076 | 0.0054 |
|                                     |          | S3     | 0.9536 | 0.0147 | 0.0122 | 0.9555 | 0.0109 | 0.0077 | 0.9591 | 0.0071 | 0.0060 |
|                                     |          | S4     | 0.9530 | 0.0155 | 0.0128 | 0.9554 | 0.0107 | 0.0077 | 0.9569 | 0.0093 | 0.0045 |
|                                     | (80,40)  | S1     | 0.9529 | 0.0139 | 0.0115 | 0.9602 | 0.0079 | 0.0065 | 0.9569 | 0.0053 | 0.0034 |
|                                     |          | S2     | 0.9528 | 0.0119 | 0.0109 | 0.9603 | 0.0079 | 0.0064 | 0.9575 | 0.0059 | 0.0040 |
|                                     |          | S3     | 0.9536 | 0.0121 | 0.0104 | 0.9605 | 0.0081 | 0.0046 | 0.9580 | 0.0065 | 0.0046 |
|                                     |          | S4     | 0.9533 | 0.0137 | 0.0099 | 0.9604 | 0.0080 | 0.0070 | 0.9563 | 0.0070 | 0.0028 |
|                                     | (80,64)  | S1     | 0.9538 | 0.0121 | 0.0101 | 0.9591 | 0.0068 | 0.0048 | 0.9566 | 0.0040 | 0.0021 |
|                                     |          | S2     | 0.9538 | 0.0103 | 0.0087 | 0.9590 | 0.0067 | 0.0047 | 0.9570 | 0.0035 | 0.0035 |
|                                     |          | S3     | 0.9539 | 0.0103 | 0.0087 | 0.9573 | 0.0051 | 0.0047 | 0.9570 | 0.0041 | 0.0045 |
|                                     |          | S4     | 0.9536 | 0.0112 | 0.0094 | 0.9596 | 0.0073 | 0.0048 | 0.9561 | 0.0025 | 0.0021 |
| (1.5,2)                             | (40,20)  | S1     | 0.9527 | 0.0154 | 0.0128 | 0.9604 | 0.0128 | 0.0108 | 0.9576 | 0.0045 | 0.0043 |
|                                     |          | S2     | 0.9521 | 0.0141 | 0.0115 | 0.9608 | 0.0108 | 0.0100 | 0.9584 | 0.0054 | 0.0052 |
|                                     |          | S3     | 0.9588 | 0.0137 | 0.0106 | 0.9607 | 0.0103 | 0.0089 | 0.9601 | 0.0071 | 0.0068 |
|                                     |          | S4     | 0.9522 | 0.0134 | 0.0107 | 0.9608 | 0.0098 | 0.0098 | 0.9568 | 0.0036 | 0.0035 |
|                                     | (40,32)  | S1     | 0.9530 | 0.0120 | 0.0100 | 0.9603 | 0.0099 | 0.0103 | 0.9578 | 0.0047 | 0.0045 |
|                                     |          | S2     | 0.9530 | 0.0116 | 0.0096 | 0.9597 | 0.0087 | 0.0100 | 0.9586 | 0.0056 | 0.0054 |
|                                     |          | S3     | 0.9535 | 0.0107 | 0.0088 | 0.9596 | 0.0082 | 0.0079 | 0.9587 | 0.0058 | 0.0055 |
|                                     |          | S4     | 0.9530 | 0.0119 | 0.0098 | 0.9602 | 0.0093 | 0.0090 | 0.9569 | 0.0037 | 0.0035 |
|                                     | (80,40)  | S1     | 0.9531 | 0.0101 | 0.0085 | 0.9540 | 0.0079 | 0.0076 | 0.9570 | 0.0035 | 0.0035 |
|                                     |          | S2     | 0.9528 | 0.0092 | 0.0077 | 0.9546 | 0.0073 | 0.0070 | 0.9579 | 0.0044 | 0.0045 |
|                                     |          | S3     | 0.9525 | 0.0083 | 0.0067 | 0.9403 | 0.0071 | 0.0069 | 0.9582 | 0.0047 | 0.0048 |
|                                     |          | S4     | 0.9529 | 0.0088 | 0.0072 | 0.9549 | 0.0077 | 0.0074 | 0.9564 | 0.0039 | 0.0029 |
|                                     | (80,64)  | S1     | 0.9535 | 0.0083 | 0.0069 | 0.9553 | 0.0057 | 0.0049 | 0.9569 | 0.0034 | 0.0034 |
|                                     |          | S2     | 0.9534 | 0.0077 | 0.0064 | 0.9551 | 0.0053 | 0.0047 | 0.9573 | 0.0037 | 0.0038 |
|                                     |          | S3     | 0.9536 | 0.0073 | 0.0060 | 0.9547 | 0.0059 | 0.0081 | 0.9576 | 0.0041 | 0.0041 |
|                                     |          | S4     | 0.9535 | 0.0081 | 0.0068 | 0.9551 | 0.0053 | 0.0047 | 0.9562 | 0.0026 | 0.0027 |

Table S5: The Av.Es ( $1^{st}$  column), RMSEs ( $2^{nd}$  column) and MRABs ( $3^{rd}$  column) of  $h(t)$  when  $\sigma = 0.8$ .

| $(T_1, T_2)$<br>Prior $\rightarrow$ | $(n, m)$ | Scheme | MLE    |        |        | MCMC   |        |        |        |        |        |
|-------------------------------------|----------|--------|--------|--------|--------|--------|--------|--------|--------|--------|--------|
|                                     |          |        |        |        |        | P1     |        |        | P2     |        |        |
| (0.5,1)                             | (40,20)  | S1     | 0.6600 | 0.2197 | 0.2693 | 0.5158 | 0.1555 | 0.2247 | 0.5493 | 0.1108 | 0.1578 |
|                                     |          | S2     | 0.6680 | 0.1939 | 0.2408 | 0.5028 | 0.1667 | 0.2319 | 0.5469 | 0.1157 | 0.1629 |
|                                     |          | S3     | 0.4886 | 0.1803 | 0.2616 | 0.6687 | 0.1738 | 0.2032 | 0.5338 | 0.1296 | 0.1829 |
|                                     |          | S4     | 0.6624 | 0.1870 | 0.2405 | 0.4996 | 0.1675 | 0.2227 | 0.5687 | 0.0892 | 0.1269 |
|                                     | (40,32)  | S1     | 0.6544 | 0.1733 | 0.2108 | 0.6462 | 0.1469 | 0.1815 | 0.5607 | 0.0996 | 0.1411 |
|                                     |          | S2     | 0.5010 | 0.1661 | 0.2348 | 0.6192 | 0.1385 | 0.1784 | 0.5579 | 0.1063 | 0.1473 |
|                                     |          | S3     | 0.6535 | 0.1584 | 0.2086 | 0.6100 | 0.1314 | 0.1757 | 0.5392 | 0.1249 | 0.1615 |
|                                     |          | S4     | 0.6568 | 0.1678 | 0.2049 | 0.6477 | 0.1303 | 0.1625 | 0.5774 | 0.0804 | 0.1237 |
|                                     | (80,40)  | S1     | 0.6530 | 0.1428 | 0.1797 | 0.5478 | 0.1235 | 0.1512 | 0.5756 | 0.0740 | 0.1112 |
|                                     |          | S2     | 0.6583 | 0.1605 | 0.1950 | 0.6589 | 0.1283 | 0.1578 | 0.5654 | 0.0850 | 0.1270 |
|                                     |          | S3     | 0.5277 | 0.1431 | 0.1947 | 0.6527 | 0.1215 | 0.1494 | 0.5361 | 0.1134 | 0.1322 |
|                                     |          | S4     | 0.5372 | 0.1321 | 0.1917 | 0.6564 | 0.1224 | 0.1492 | 0.5739 | 0.0751 | 0.1139 |
|                                     | (80,64)  | S1     | 0.6483 | 0.1180 | 0.1456 | 0.6098 | 0.1137 | 0.1382 | 0.5856 | 0.0650 | 0.0958 |
|                                     |          | S2     | 0.5854 | 0.1105 | 0.1510 | 0.6508 | 0.1090 | 0.1344 | 0.5673 | 0.0832 | 0.1241 |
|                                     |          | S3     | 0.6255 | 0.1319 | 0.1732 | 0.6474 | 0.1092 | 0.1353 | 0.5626 | 0.0887 | 0.1273 |
|                                     |          | S4     | 0.6491 | 0.1138 | 0.1403 | 0.6122 | 0.1064 | 0.1321 | 0.5910 | 0.0583 | 0.0876 |
| (1.5,2)                             | (40,20)  | S1     | 0.6694 | 0.1835 | 0.2382 | 0.5033 | 0.1647 | 0.2154 | 0.5599 | 0.1003 | 0.1421 |
|                                     |          | S2     | 0.4688 | 0.1942 | 0.2812 | 0.6702 | 0.1752 | 0.2046 | 0.5506 | 0.1151 | 0.1582 |
|                                     |          | S3     | 0.4859 | 0.1816 | 0.2635 | 0.6627 | 0.1794 | 0.2104 | 0.5435 | 0.1210 | 0.1692 |
|                                     |          | S4     | 0.6743 | 0.1774 | 0.2253 | 0.5095 | 0.1562 | 0.2081 | 0.5538 | 0.0995 | 0.1449 |
|                                     | (40,32)  | S1     | 0.6559 | 0.1427 | 0.1829 | 0.5422 | 0.1257 | 0.1716 | 0.5584 | 0.1014 | 0.1437 |
|                                     |          | S2     | 0.5216 | 0.1439 | 0.1930 | 0.6579 | 0.1390 | 0.1767 | 0.5473 | 0.1124 | 0.1518 |
|                                     |          | S3     | 0.6485 | 0.1509 | 0.1861 | 0.5393 | 0.1246 | 0.1750 | 0.5454 | 0.1186 | 0.1676 |
|                                     |          | S4     | 0.6527 | 0.1531 | 0.1878 | 0.5486 | 0.1193 | 0.1733 | 0.5719 | 0.0859 | 0.1291 |
|                                     | (80,40)  | S1     | 0.6342 | 0.1318 | 0.1680 | 0.6591 | 0.1220 | 0.1476 | 0.5604 | 0.0888 | 0.1348 |
|                                     |          | S2     | 0.6598 | 0.1156 | 0.1614 | 0.5915 | 0.1106 | 0.1510 | 0.5431 | 0.1063 | 0.1394 |
|                                     |          | S3     | 0.6555 | 0.1384 | 0.1696 | 0.6391 | 0.1268 | 0.1663 | 0.5345 | 0.1150 | 0.1421 |
|                                     |          | S4     | 0.6595 | 0.1156 | 0.1540 | 0.5641 | 0.0924 | 0.1219 | 0.5749 | 0.0741 | 0.1124 |
|                                     | (80,64)  | S1     | 0.6209 | 0.1130 | 0.1493 | 0.6517 | 0.0970 | 0.1184 | 0.5776 | 0.0723 | 0.1035 |
|                                     |          | S2     | 0.5814 | 0.1097 | 0.1416 | 0.6525 | 0.0949 | 0.1157 | 0.5742 | 0.0774 | 0.1082 |
|                                     |          | S3     | 0.6481 | 0.1176 | 0.1469 | 0.6254 | 0.1036 | 0.1271 | 0.5794 | 0.0753 | 0.1055 |
|                                     |          | S4     | 0.6500 | 0.1131 | 0.1428 | 0.6207 | 0.1102 | 0.1345 | 0.5925 | 0.0569 | 0.0853 |

Table S6: The Av.Es ( $1^{st}$  column), RMSEs ( $2^{nd}$  column) and MRABs ( $3^{rd}$  column) of  $h(t)$  when  $\sigma = 1.5$ .

| $(T_1, T_2)$<br>Prior $\rightarrow$ | $(n, m)$ | Scheme | MLE    |        |        |        | MCMC   |        |        |        |        |
|-------------------------------------|----------|--------|--------|--------|--------|--------|--------|--------|--------|--------|--------|
|                                     |          |        |        |        |        |        | P1     |        | P2     |        |        |
| (0.5,1)                             | (40,20)  | S1     | 0.2826 | 0.1235 | 0.3466 | 0.2339 | 0.1146 | 0.2055 | 0.2639 | 0.0103 | 0.1346 |
|                                     |          | S2     | 0.2837 | 0.1033 | 0.2935 | 0.2336 | 0.0763 | 0.1613 | 0.2435 | 0.0331 | 0.1114 |
|                                     |          | S3     | 0.2723 | 0.0889 | 0.2602 | 0.2326 | 0.0714 | 0.1591 | 0.2406 | 0.0363 | 0.1224 |
|                                     |          | S4     | 0.2781 | 0.0968 | 0.2825 | 0.2329 | 0.0671 | 0.1480 | 0.2539 | 0.0272 | 0.0964 |
|                                     | (40,32)  | S1     | 0.2758 | 0.0961 | 0.2776 | 0.2403 | 0.0400 | 0.1346 | 0.2487 | 0.0272 | 0.0915 |
|                                     |          | S2     | 0.2737 | 0.0882 | 0.2542 | 0.2413 | 0.0391 | 0.1318 | 0.2500 | 0.0232 | 0.0830 |
|                                     |          | S3     | 0.2730 | 0.0868 | 0.2518 | 0.2513 | 0.0361 | 0.0935 | 0.2531 | 0.0301 | 0.0989 |
|                                     |          | S4     | 0.2767 | 0.0913 | 0.2638 | 0.2377 | 0.0428 | 0.1138 | 0.2535 | 0.0217 | 0.0728 |
|                                     | (80,40)  | S1     | 0.2769 | 0.0818 | 0.2363 | 0.2658 | 0.0347 | 0.1099 | 0.2534 | 0.0197 | 0.0703 |
|                                     |          | S2     | 0.2779 | 0.0743 | 0.2186 | 0.2677 | 0.0322 | 0.0986 | 0.2530 | 0.0203 | 0.0718 |
|                                     |          | S3     | 0.2731 | 0.0691 | 0.1974 | 0.2677 | 0.0322 | 0.0857 | 0.2470 | 0.0262 | 0.0939 |
|                                     |          | S4     | 0.2746 | 0.0728 | 0.2183 | 0.2699 | 0.0334 | 0.0964 | 0.2571 | 0.0159 | 0.0569 |
|                                     | (80,64)  | S1     | 0.2716 | 0.0711 | 0.2084 | 0.2640 | 0.0312 | 0.0985 | 0.2553 | 0.0179 | 0.0636 |
|                                     |          | S2     | 0.2715 | 0.0608 | 0.1793 | 0.2618 | 0.0303 | 0.0904 | 0.2625 | 0.0128 | 0.0406 |
|                                     |          | S3     | 0.2714 | 0.0606 | 0.1789 | 0.2618 | 0.0303 | 0.0813 | 0.2643 | 0.0174 | 0.0556 |
|                                     |          | S4     | 0.2732 | 0.0662 | 0.1933 | 0.2621 | 0.0305 | 0.0888 | 0.2583 | 0.0147 | 0.0526 |
| (1.5,2)                             | (40,20)  | S1     | 0.2785 | 0.0911 | 0.2635 | 0.2331 | 0.0532 | 0.1743 | 0.2493 | 0.0327 | 0.1031 |
|                                     |          | S2     | 0.2819 | 0.0830 | 0.2362 | 0.2308 | 0.0490 | 0.1643 | 0.2447 | 0.0377 | 0.1217 |
|                                     |          | S3     | 0.2735 | 0.0861 | 0.2582 | 0.2314 | 0.0481 | 0.1620 | 0.2345 | 0.0411 | 0.1306 |
|                                     |          | S4     | 0.2814 | 0.0790 | 0.2207 | 0.2307 | 0.0489 | 0.1645 | 0.2538 | 0.0284 | 0.0913 |
|                                     | (40,32)  | S1     | 0.2766 | 0.0710 | 0.2050 | 0.2336 | 0.0461 | 0.1552 | 0.2484 | 0.0284 | 0.0924 |
|                                     |          | S2     | 0.2763 | 0.0681 | 0.1983 | 0.2369 | 0.0427 | 0.1440 | 0.2436 | 0.0329 | 0.1109 |
|                                     |          | S3     | 0.2733 | 0.0627 | 0.1807 | 0.2376 | 0.0418 | 0.1412 | 0.2431 | 0.0338 | 0.1135 |
|                                     |          | S4     | 0.2764 | 0.0703 | 0.2027 | 0.2343 | 0.0454 | 0.1528 | 0.2535 | 0.0217 | 0.0728 |
|                                     | (80,40)  | S1     | 0.2761 | 0.0596 | 0.1746 | 0.2703 | 0.0335 | 0.1005 | 0.2528 | 0.0239 | 0.0727 |
|                                     |          | S2     | 0.2775 | 0.0544 | 0.1583 | 0.2671 | 0.0353 | 0.1166 | 0.2476 | 0.0256 | 0.0918 |
|                                     |          | S3     | 0.2791 | 0.0486 | 0.1371 | 0.2512 | 0.0358 | 0.1188 | 0.2458 | 0.0274 | 0.0984 |
|                                     |          | S4     | 0.2743 | 0.0519 | 0.1690 | 0.2650 | 0.0370 | 0.1234 | 0.2562 | 0.0184 | 0.0657 |
|                                     | (80,64)  | S1     | 0.2734 | 0.0487 | 0.1425 | 0.2627 | 0.0303 | 0.0969 | 0.2533 | 0.0198 | 0.0708 |
|                                     |          | S2     | 0.2739 | 0.0453 | 0.1313 | 0.2638 | 0.0303 | 0.0965 | 0.2512 | 0.0220 | 0.0784 |
|                                     |          | S3     | 0.2728 | 0.0427 | 0.1242 | 0.2663 | 0.0306 | 0.0959 | 0.2494 | 0.0239 | 0.0851 |
|                                     |          | S4     | 0.2713 | 0.0477 | 0.1390 | 0.2639 | 0.0305 | 0.0968 | 0.2574 | 0.0155 | 0.0556 |

Table S7: The ACLs ( $1^{st}$  column) and CPs ( $2^{nd}$  column) of 95% asymptotic and credible intervals of  $\sigma$  when  $\sigma = 0.8$ .

| $(T_1, T_2) \rightarrow$<br>$(n, m)$ | Scheme | (0.5,1)             |       |       |        |       |       | (1.5,2) |       |       |       |       |       |
|--------------------------------------|--------|---------------------|-------|-------|--------|-------|-------|---------|-------|-------|-------|-------|-------|
|                                      |        | ACI-NA              |       | BCI   |        |       |       | ACI-NA  |       | BCI   |       |       |       |
|                                      |        | Prior $\rightarrow$ |       | P1    |        | P2    |       |         |       | P1    |       | P2    |       |
| (40,20)                              | S1     | 0.862               | 0.940 | 0.420 | 0.970  | 0.213 | 0.981 | 0.436   | 0.963 | 0.398 | 0.974 | 0.200 | 0.981 |
|                                      | S2     | 0.910               | 0.929 | 0.400 | 0.973  | 0.232 | 0.980 | 0.519   | 0.955 | 0.357 | 0.977 | 0.229 | 0.981 |
|                                      | S3     | 0.618               | 0.953 | 0.416 | 0.972  | 0.273 | 0.978 | 0.537   | 0.954 | 0.401 | 0.973 | 0.263 | 0.979 |
|                                      | S4     | 0.729               | 0.946 | 0.379 | 0.976  | 0.165 | 0.986 | 0.545   | 0.954 | 0.345 | 0.978 | 0.141 | 0.988 |
| (40,32)                              | S1     | 0.659               | 0.951 | 0.367 | 0.9760 | 0.200 | 0.982 | 0.361   | 0.970 | 0.347 | 0.978 | 0.192 | 0.984 |
|                                      | S2     | 0.668               | 0.950 | 0.348 | 0.978  | 0.165 | 0.986 | 0.372   | 0.968 | 0.348 | 0.978 | 0.140 | 0.988 |
|                                      | S3     | 0.600               | 0.954 | 0.395 | 0.973  | 0.269 | 0.979 | 0.485   | 0.957 | 0.371 | 0.980 | 0.233 | 0.982 |
|                                      | S4     | 0.668               | 0.951 | 0.357 | 0.978  | 0.154 | 0.988 | 0.457   | 0.958 | 0.306 | 0.983 | 0.125 | 0.990 |
| (80,40)                              | S1     | 0.562               | 0.962 | 0.338 | 0.980  | 0.120 | 0.990 | 0.336   | 0.972 | 0.298 | 0.984 | 0.108 | 0.991 |
|                                      | S2     | 0.637               | 0.951 | 0.336 | 0.981  | 0.149 | 0.988 | 0.360   | 0.970 | 0.336 | 0.979 | 0.116 | 0.991 |
|                                      | S3     | 0.447               | 0.975 | 0.371 | 0.979  | 0.120 | 0.990 | 0.363   | 0.970 | 0.347 | 0.982 | 0.101 | 0.992 |
|                                      | S4     | 0.501               | 0.970 | 0.337 | 0.980  | 0.085 | 0.993 | 0.380   | 0.967 | 0.261 | 0.986 | 0.070 | 0.993 |
| (80,64)                              | S1     | 0.414               | 0.978 | 0.327 | 0.982  | 0.084 | 0.993 | 0.283   | 0.978 | 0.241 | 0.988 | 0.080 | 0.993 |
|                                      | S2     | 0.443               | 0.975 | 0.325 | 0.983  | 0.108 | 0.991 | 0.303   | 0.977 | 0.259 | 0.987 | 0.101 | 0.991 |
|                                      | S3     | 0.414               | 0.978 | 0.327 | 0.982  | 0.116 | 0.990 | 0.333   | 0.975 | 0.309 | 0.984 | 0.104 | 0.991 |
|                                      | S4     | 0.462               | 0.971 | 0.285 | 0.986  | 0.065 | 0.996 | 0.316   | 0.976 | 0.151 | 0.992 | 0.061 | 0.995 |
|                                      |        | ACI-NL              |       | HPD   |        |       |       | ACI-NL  |       | HPD   |       |       |       |
| (40,20)                              | S1     | 0.901               | 0.931 | 0.412 | 0.972  | 0.209 | 0.982 | 0.441   | 0.961 | 0.392 | 0.975 | 0.201 | 0.981 |
|                                      | S2     | 0.957               | 0.927 | 0.393 | 0.974  | 0.232 | 0.980 | 0.529   | 0.954 | 0.355 | 0.977 | 0.226 | 0.981 |
|                                      | S3     | 0.863               | 0.934 | 0.409 | 0.973  | 0.256 | 0.979 | 0.547   | 0.953 | 0.419 | 0.972 | 0.259 | 0.978 |
|                                      | S4     | 0.753               | 0.938 | 0.372 | 0.975  | 0.186 | 0.984 | 0.556   | 0.952 | 0.339 | 0.979 | 0.158 | 0.986 |
| (40,32)                              | S1     | 0.677               | 0.947 | 0.361 | 0.977  | 0.195 | 0.983 | 0.394   | 0.965 | 0.355 | 0.977 | 0.194 | 0.984 |
|                                      | S2     | 0.869               | 0.934 | 0.345 | 0.978  | 0.162 | 0.986 | 0.375   | 0.968 | 0.341 | 0.978 | 0.133 | 0.987 |
|                                      | S3     | 0.614               | 0.950 | 0.387 | 0.975  | 0.198 | 0.983 | 0.492   | 0.956 | 0.400 | 0.974 | 0.185 | 0.985 |
|                                      | S4     | 0.687               | 0.947 | 0.335 | 0.980  | 0.151 | 0.988 | 0.463   | 0.958 | 0.304 | 0.983 | 0.125 | 0.990 |
| (80,40)                              | S1     | 0.573               | 0.960 | 0.336 | 0.980  | 0.111 | 0.992 | 0.349   | 0.970 | 0.333 | 0.979 | 0.108 | 0.991 |
|                                      | S2     | 0.654               | 0.948 | 0.333 | 0.981  | 0.128 | 0.990 | 0.363   | 0.969 | 0.330 | 0.979 | 0.100 | 0.992 |
|                                      | S3     | 0.531               | 0.963 | 0.369 | 0.978  | 0.116 | 0.992 | 0.366   | 0.970 | 0.346 | 0.982 | 0.102 | 0.992 |
|                                      | S4     | 0.509               | 0.965 | 0.329 | 0.981  | 0.078 | 0.994 | 0.384   | 0.968 | 0.260 | 0.986 | 0.063 | 0.994 |
| (80,64)                              | S1     | 0.418               | 0.975 | 0.325 | 0.982  | 0.078 | 0.994 | 0.341   | 0.971 | 0.281 | 0.985 | 0.075 | 0.993 |
|                                      | S2     | 0.448               | 0.972 | 0.329 | 0.983  | 0.098 | 0.993 | 0.326   | 0.975 | 0.301 | 0.983 | 0.092 | 0.992 |
|                                      | S3     | 0.418               | 0.975 | 0.325 | 0.983  | 0.103 | 0.992 | 0.335   | 0.974 | 0.308 | 0.983 | 0.095 | 0.991 |
|                                      | S4     | 0.468               | 0.969 | 0.282 | 0.985  | 0.057 | 0.997 | 0.318   | 0.975 | 0.150 | 0.992 | 0.053 | 0.996 |



Table S8: The ACLs ( $1^{st}$  column) and CPs ( $2^{nd}$  column) of 95% asymptotic and credible intervals of  $\sigma$  when  $\sigma = 1.5$ .

| $(T_1, T_2) \rightarrow$ | Scheme | (0.5,1) |       |       |       |       |       | (1.5,2) |       |       |       |       |       |
|--------------------------|--------|---------|-------|-------|-------|-------|-------|---------|-------|-------|-------|-------|-------|
| $(n, m)$                 |        | ACI-NA  |       | BCI   |       |       |       | ACI-NA  |       | BCI   |       |       |       |
| Prior $\rightarrow$      |        |         |       | P1    |       | P2    |       |         |       | P1    |       | P2    |       |
| (40,20)                  | S1     | 2.389   | 0.912 | 0.427 | 0.956 | 0.210 | 0.974 | 0.783   | 0.951 | 0.443 | 0.954 | 0.272 | 0.970 |
|                          | S2     | 1.652   | 0.931 | 0.432 | 0.954 | 0.261 | 0.972 | 0.811   | 0.948 | 0.423 | 0.955 | 0.254 | 0.973 |
|                          | S3     | 1.511   | 0.936 | 0.444 | 0.953 | 0.269 | 0.972 | 0.527   | 0.958 | 0.412 | 0.955 | 0.280 | 0.971 |
|                          | S4     | 1.674   | 0.929 | 0.442 | 0.953 | 0.263 | 0.971 | 0.693   | 0.954 | 0.417 | 0.956 | 0.162 | 0.978 |
| (40,32)                  | S1     | 1.780   | 0.927 | 0.418 | 0.957 | 0.179 | 0.977 | 0.613   | 0.957 | 0.413 | 0.957 | 0.212 | 0.974 |
|                          | S2     | 1.483   | 0.939 | 0.407 | 0.958 | 0.119 | 0.982 | 0.609   | 0.958 | 0.420 | 0.956 | 0.231 | 0.973 |
|                          | S3     | 1.479   | 0.939 | 0.418 | 0.957 | 0.191 | 0.975 | 0.451   | 0.966 | 0.406 | 0.957 | 0.228 | 0.973 |
|                          | S4     | 1.646   | 0.930 | 0.416 | 0.957 | 0.183 | 0.976 | 0.621   | 0.958 | 0.407 | 0.957 | 0.143 | 0.980 |
| (80,40)                  | S1     | 1.465   | 0.938 | 0.409 | 0.960 | 0.159 | 0.975 | 0.524   | 0.959 | 0.400 | 0.962 | 0.187 | 0.976 |
|                          | S2     | 1.078   | 0.945 | 0.398 | 0.962 | 0.107 | 0.983 | 0.566   | 0.961 | 0.405 | 0.962 | 0.108 | 0.983 |
|                          | S3     | 0.988   | 0.946 | 0.398 | 0.962 | 0.173 | 0.978 | 0.364   | 0.969 | 0.391 | 0.963 | 0.117 | 0.989 |
|                          | S4     | 1.126   | 0.944 | 0.403 | 0.961 | 0.168 | 0.977 | 0.480   | 0.973 | 0.395 | 0.962 | 0.107 | 0.990 |
| (80,64)                  | S1     | 1.177   | 0.943 | 0.366 | 0.965 | 0.139 | 0.978 | 0.421   | 0.965 | 0.397 | 0.968 | 0.116 | 0.989 |
|                          | S2     | 0.989   | 0.947 | 0.360 | 0.964 | 0.098 | 0.984 | 0.424   | 0.965 | 0.370 | 0.969 | 0.094 | 0.991 |
|                          | S3     | 0.979   | 0.946 | 0.337 | 0.968 | 0.116 | 0.982 | 0.338   | 0.971 | 0.261 | 0.975 | 0.095 | 0.990 |
|                          | S4     | 1.103   | 0.947 | 0.390 | 0.962 | 0.140 | 0.978 | 0.431   | 0.970 | 0.350 | 0.970 | 0.087 | 0.991 |
|                          |        | ACI-NL  |       | HPD   |       |       |       | ACI-NL  |       | HPD   |       |       |       |
| (40,20)                  | S1     | 2.649   | 0.909 | 0.415 | 0.957 | 0.206 | 0.975 | 0.791   | 0.951 | 0.430 | 0.955 | 0.223 | 0.975 |
|                          | S2     | 1.730   | 0.929 | 0.419 | 0.955 | 0.256 | 0.972 | 0.821   | 0.947 | 0.421 | 0.955 | 0.256 | 0.973 |
|                          | S3     | 1.571   | 0.935 | 0.419 | 0.955 | 0.286 | 0.970 | 0.776   | 0.952 | 0.418 | 0.954 | 0.285 | 0.971 |
|                          | S4     | 1.755   | 0.926 | 0.429 | 0.954 | 0.216 | 0.976 | 0.699   | 0.954 | 0.414 | 0.956 | 0.188 | 0.977 |
| (40,32)                  | S1     | 1.884   | 0.925 | 0.416 | 0.957 | 0.097 | 0.983 | 0.617   | 0.957 | 0.411 | 0.957 | 0.208 | 0.974 |
|                          | S2     | 1.540   | 0.937 | 0.405 | 0.958 | 0.117 | 0.982 | 0.613   | 0.958 | 0.408 | 0.957 | 0.215 | 0.973 |
|                          | S3     | 1.536   | 0.937 | 0.416 | 0.957 | 0.231 | 0.973 | 0.530   | 0.962 | 0.401 | 0.957 | 0.272 | 0.972 |
|                          | S4     | 1.724   | 0.928 | 0.414 | 0.957 | 0.158 | 0.980 | 0.625   | 0.958 | 0.406 | 0.957 | 0.160 | 0.979 |
| (80,40)                  | S1     | 1.522   | 0.936 | 0.405 | 0.960 | 0.088 | 0.984 | 0.527   | 0.959 | 0.395 | 0.961 | 0.178 | 0.976 |
|                          | S2     | 1.100   | 0.944 | 0.387 | 0.963 | 0.091 | 0.984 | 0.569   | 0.961 | 0.394 | 0.963 | 0.114 | 0.983 |
|                          | S3     | 1.005   | 0.944 | 0.387 | 0.963 | 0.103 | 0.980 | 0.452   | 0.966 | 0.386 | 0.962 | 0.139 | 0.987 |
|                          | S4     | 1.137   | 0.943 | 0.391 | 0.962 | 0.090 | 0.984 | 0.482   | 0.973 | 0.396 | 0.962 | 0.127 | 0.988 |
| (80,64)                  | S1     | 1.206   | 0.942 | 0.365 | 0.965 | 0.075 | 0.987 | 0.425   | 0.965 | 0.379 | 0.969 | 0.076 | 0.990 |
|                          | S2     | 1.006   | 0.947 | 0.359 | 0.964 | 0.073 | 0.986 | 0.426   | 0.965 | 0.368 | 0.969 | 0.072 | 0.990 |
|                          | S3     | 0.996   | 0.944 | 0.337 | 0.968 | 0.084 | 0.985 | 0.365   | 0.969 | 0.259 | 0.975 | 0.082 | 0.986 |
|                          | S4     | 1.127   | 0.946 | 0.339 | 0.967 | 0.057 | 0.988 | 0.432   | 0.970 | 0.368 | 0.969 | 0.053 | 0.989 |

Table S9: The ACLs ( $1^{st}$  column) and CPs ( $2^{nd}$  column) of 95% asymptotic and credible intervals of  $R(t)$  when  $\sigma = 0.8$ .

| $(T_1, T_2) \rightarrow$<br>$(n, m)$<br>Prior $\rightarrow$ | Scheme | (0.5,1) |       |       |       |       |       | (1.5,2) |       |       |       |        |       |
|-------------------------------------------------------------|--------|---------|-------|-------|-------|-------|-------|---------|-------|-------|-------|--------|-------|
|                                                             |        | ACI-NA  |       | BCI   |       |       |       | ACI-NA  |       | BCI   |       |        |       |
|                                                             |        |         |       | P1    |       | P2    |       |         |       | P1    |       | P2     |       |
| (40,20)                                                     | S1     | 0.139   | 0.948 | 0.087 | 0.957 | 0.032 | 0.966 | 0.081   | 0.957 | 0.078 | 0.959 | 0.040  | 0.965 |
|                                                             | S2     | 0.162   | 0.946 | 0.075 | 0.959 | 0.035 | 0.965 | 0.098   | 0.955 | 0.064 | 0.961 | 0.039  | 0.965 |
|                                                             | S3     | 0.116   | 0.950 | 0.078 | 0.959 | 0.043 | 0.962 | 0.096   | 0.955 | 0.082 | 0.958 | 0.038  | 0.963 |
|                                                             | S4     | 0.128   | 0.949 | 0.077 | 0.960 | 0.034 | 0.965 | 0.102   | 0.953 | 0.064 | 0.961 | 0.037  | 0.964 |
| (40,32)                                                     | S1     | 0.111   | 0.950 | 0.067 | 0.964 | 0.029 | 0.967 | 0.063   | 0.963 | 0.066 | 0.965 | 0.030  | 0.967 |
|                                                             | S2     | 0.121   | 0.949 | 0.062 | 0.965 | 0.026 | 0.969 | 0.068   | 0.963 | 0.055 | 0.968 | 0.035  | 0.966 |
|                                                             | S3     | 0.102   | 0.951 | 0.070 | 0.963 | 0.039 | 0.964 | 0.083   | 0.960 | 0.075 | 0.962 | 0.031  | 0.965 |
|                                                             | S4     | 0.114   | 0.951 | 0.062 | 0.965 | 0.026 | 0.969 | 0.080   | 0.960 | 0.044 | 0.970 | 0.025  | 0.969 |
| (80,40)                                                     | S1     | 0.097   | 0.953 | 0.055 | 0.969 | 0.017 | 0.973 | 0.055   | 0.965 | 0.048 | 0.971 | 0.022  | 0.971 |
|                                                             | S2     | 0.115   | 0.951 | 0.050 | 0.970 | 0.019 | 0.972 | 0.062   | 0.964 | 0.045 | 0.971 | 0.016  | 0.975 |
|                                                             | S3     | 0.084   | 0.955 | 0.052 | 0.969 | 0.020 | 0.972 | 0.065   | 0.963 | 0.050 | 0.969 | 0.019  | 0.972 |
|                                                             | S4     | 0.090   | 0.954 | 0.047 | 0.971 | 0.015 | 0.975 | 0.070   | 0.962 | 0.041 | 0.972 | 0.017  | 0.975 |
| (80,64)                                                     | S1     | 0.072   | 0.957 | 0.050 | 0.970 | 0.012 | 0.976 | 0.043   | 0.967 | 0.044 | 0.971 | 0.013  | 0.976 |
|                                                             | S2     | 0.079   | 0.957 | 0.047 | 0.971 | 0.015 | 0.975 | 0.047   | 0.967 | 0.042 | 0.971 | 0.014  | 0.975 |
|                                                             | S3     | 0.072   | 0.958 | 0.050 | 0.970 | 0.017 | 0.974 | 0.058   | 0.966 | 0.048 | 0.970 | 0.015  | 0.975 |
|                                                             | S4     | 0.081   | 0.956 | 0.044 | 0.971 | 0.013 | 0.976 | 0.056   | 0.966 | 0.032 | 0.972 | 0.010  | 0.977 |
|                                                             |        | ACI-NL  |       | HPD   |       |       |       | ACI-NL  |       | HPD   |       |        |       |
| (40,20)                                                     | S1     | 0.139   | 0.948 | 0.082 | 0.958 | 0.033 | 0.966 | 0.081   | 0.957 | 0.074 | 0.961 | 0.029  | 0.972 |
|                                                             | S2     | 0.162   | 0.946 | 0.071 | 0.961 | 0.031 | 0.966 | 0.098   | 0.955 | 0.056 | 0.967 | 0.030  | 0.972 |
|                                                             | S3     | 0.116   | 0.950 | 0.073 | 0.960 | 0.036 | 0.965 | 0.096   | 0.955 | 0.077 | 0.960 | 0.034  | 0.971 |
|                                                             | S4     | 0.128   | 0.949 | 0.073 | 0.960 | 0.029 | 0.967 | 0.102   | 0.953 | 0.061 | 0.963 | 0.0278 | 0.973 |
| (40,32)                                                     | S1     | 0.121   | 0.949 | 0.064 | 0.965 | 0.029 | 0.967 | 0.063   | 0.963 | 0.057 | 0.967 | 0.024  | 0.975 |
|                                                             | S2     | 0.124   | 0.949 | 0.058 | 0.967 | 0.025 | 0.969 | 0.068   | 0.963 | 0.052 | 0.968 | 0.023  | 0.976 |
|                                                             | S3     | 0.102   | 0.951 | 0.066 | 0.964 | 0.030 | 0.966 | 0.083   | 0.960 | 0.061 | 0.965 | 0.027  | 0.973 |
|                                                             | S4     | 0.114   | 0.951 | 0.058 | 0.967 | 0.025 | 0.969 | 0.080   | 0.960 | 0.062 | 0.966 | 0.0234 | 0.976 |
| (80,40)                                                     | S1     | 0.097   | 0.953 | 0.058 | 0.967 | 0.016 | 0.973 | 0.055   | 0.965 | 0.046 | 0.971 | 0.013  | 0.979 |
|                                                             | S2     | 0.115   | 0.951 | 0.051 | 0.968 | 0.014 | 0.974 | 0.057   | 0.966 | 0.044 | 0.971 | 0.011  | 0.980 |
|                                                             | S3     | 0.088   | 0.956 | 0.054 | 0.969 | 0.016 | 0.973 | 0.065   | 0.963 | 0.048 | 0.969 | 0.012  | 0.979 |
|                                                             | S4     | 0.090   | 0.954 | 0.045 | 0.970 | 0.020 | 0.972 | 0.070   | 0.962 | 0.042 | 0.972 | 0.017  | 0.975 |
| (80,64)                                                     | S1     | 0.072   | 0.957 | 0.048 | 0.970 | 0.011 | 0.976 | 0.043   | 0.967 | 0.043 | 0.971 | 0.011  | 0.981 |
|                                                             | S2     | 0.079   | 0.957 | 0.046 | 0.971 | 0.012 | 0.976 | 0.047   | 0.967 | 0.041 | 0.971 | 0.009  | 0.980 |
|                                                             | S3     | 0.072   | 0.958 | 0.048 | 0.970 | 0.011 | 0.975 | 0.058   | 0.966 | 0.042 | 0.971 | 0.010  | 0.981 |
|                                                             | S4     | 0.081   | 0.956 | 0.042 | 0.972 | 0.013 | 0.976 | 0.056   | 0.966 | 0.029 | 0.974 | 0.009  | 0.981 |

Table S10: The ACLs ( $1^{st}$  column) and CPs ( $2^{nd}$  column) of 95% asymptotic and credible intervals of  $R(t)$  when  $\sigma = 1.5$ .

| $(T_1, T_2) \rightarrow$<br>$(n, m)$<br>Prior $\rightarrow$ | Scheme | (0.5,1) |       |       |       |       |       | (1.5,2) |       |       |       |       |       |
|-------------------------------------------------------------|--------|---------|-------|-------|-------|-------|-------|---------|-------|-------|-------|-------|-------|
|                                                             |        | ACI-NA  |       | BCI   |       |       |       | ACI-NA  |       | BCI   |       |       |       |
|                                                             |        |         |       | P1    |       | P2    |       |         |       | P1    |       | P2    |       |
| (40,20)                                                     | S1     | 0.083   | 0.942 | 0.022 | 0.956 | 0.015 | 0.961 | 0.032   | 0.951 | 0.021 | 0.958 | 0.019 | 0.960 |
|                                                             | S2     | 0.070   | 0.946 | 0.020 | 0.958 | 0.014 | 0.961 | 0.036   | 0.949 | 0.019 | 0.960 | 0.014 | 0.962 |
|                                                             | S3     | 0.067   | 0.948 | 0.021 | 0.957 | 0.017 | 0.959 | 0.038   | 0.948 | 0.027 | 0.954 | 0.012 | 0.964 |
|                                                             | S4     | 0.070   | 0.946 | 0.021 | 0.957 | 0.016 | 0.960 | 0.031   | 0.952 | 0.019 | 0.959 | 0.014 | 0.961 |
| (40,32)                                                     | S1     | 0.066   | 0.948 | 0.019 | 0.960 | 0.013 | 0.964 | 0.026   | 0.955 | 0.017 | 0.962 | 0.012 | 0.965 |
|                                                             | S2     | 0.057   | 0.950 | 0.018 | 0.961 | 0.012 | 0.966 | 0.029   | 0.953 | 0.018 | 0.961 | 0.011 | 0.965 |
|                                                             | S3     | 0.056   | 0.950 | 0.018 | 0.961 | 0.013 | 0.965 | 0.025   | 0.954 | 0.019 | 0.961 | 0.010 | 0.966 |
|                                                             | S4     | 0.064   | 0.949 | 0.018 | 0.961 | 0.014 | 0.964 | 0.026   | 0.955 | 0.018 | 0.962 | 0.010 | 0.965 |
| (80,40)                                                     | S1     | 0.058   | 0.950 | 0.015 | 0.965 | 0.010 | 0.968 | 0.022   | 0.956 | 0.015 | 0.967 | 0.009 | 0.969 |
|                                                             | S2     | 0.047   | 0.953 | 0.016 | 0.964 | 0.009 | 0.969 | 0.025   | 0.955 | 0.016 | 0.966 | 0.008 | 0.970 |
|                                                             | S3     | 0.040   | 0.955 | 0.015 | 0.965 | 0.008 | 0.970 | 0.020   | 0.957 | 0.015 | 0.967 | 0.007 | 0.971 |
|                                                             | S4     | 0.046   | 0.953 | 0.016 | 0.964 | 0.008 | 0.970 | 0.021   | 0.956 | 0.016 | 0.966 | 0.007 | 0.971 |
| (80,64)                                                     | S1     | 0.046   | 0.954 | 0.012 | 0.967 | 0.008 | 0.970 | 0.018   | 0.959 | 0.013 | 0.968 | 0.007 | 0.971 |
|                                                             | S2     | 0.040   | 0.957 | 0.014 | 0.965 | 0.007 | 0.971 | 0.018   | 0.959 | 0.013 | 0.968 | 0.006 | 0.972 |
|                                                             | S3     | 0.039   | 0.957 | 0.013 | 0.966 | 0.006 | 0.972 | 0.016   | 0.961 | 0.011 | 0.970 | 0.005 | 0.973 |
|                                                             | S4     | 0.043   | 0.955 | 0.013 | 0.967 | 0.006 | 0.972 | 0.018   | 0.960 | 0.012 | 0.969 | 0.005 | 0.973 |
|                                                             |        | ACI-NL  |       | HPD   |       |       |       | ACI-NL  |       | HPD   |       |       |       |
| (40,20)                                                     | S1     | 0.083   | 0.942 | 0.065 | 0.951 | 0.039 | 0.956 | 0.032   | 0.951 | 0.020 | 0.959 | 0.018 | 0.962 |
|                                                             | S2     | 0.070   | 0.946 | 0.069 | 0.952 | 0.038 | 0.956 | 0.036   | 0.949 | 0.018 | 0.961 | 0.014 | 0.962 |
|                                                             | S3     | 0.076   | 0.945 | 0.067 | 0.953 | 0.034 | 0.957 | 0.038   | 0.948 | 0.026 | 0.954 | 0.013 | 0.959 |
|                                                             | S4     | 0.075   | 0.945 | 0.066 | 0.952 | 0.036 | 0.955 | 0.030   | 0.952 | 0.018 | 0.960 | 0.015 | 0.960 |
| (40,32)                                                     | S1     | 0.066   | 0.948 | 0.046 | 0.955 | 0.028 | 0.959 | 0.025   | 0.955 | 0.017 | 0.961 | 0.014 | 0.964 |
|                                                             | S2     | 0.057   | 0.950 | 0.047 | 0.956 | 0.022 | 0.963 | 0.026   | 0.954 | 0.017 | 0.962 | 0.012 | 0.965 |
|                                                             | S3     | 0.056   | 0.950 | 0.042 | 0.957 | 0.021 | 0.962 | 0.027   | 0.954 | 0.018 | 0.961 | 0.010 | 0.964 |
|                                                             | S4     | 0.064   | 0.949 | 0.043 | 0.956 | 0.026 | 0.960 | 0.024   | 0.955 | 0.017 | 0.962 | 0.012 | 0.965 |
| (80,40)                                                     | S1     | 0.058   | 0.950 | 0.035 | 0.960 | 0.022 | 0.963 | 0.022   | 0.956 | 0.015 | 0.967 | 0.011 | 0.969 |
|                                                             | S2     | 0.047   | 0.953 | 0.031 | 0.959 | 0.018 | 0.964 | 0.025   | 0.955 | 0.014 | 0.966 | 0.010 | 0.970 |
|                                                             | S3     | 0.048   | 0.955 | 0.032 | 0.960 | 0.017 | 0.965 | 0.020   | 0.957 | 0.015 | 0.967 | 0.009 | 0.971 |
|                                                             | S4     | 0.057   | 0.953 | 0.033 | 0.959 | 0.015 | 0.967 | 0.022   | 0.956 | 0.014 | 0.966 | 0.011 | 0.969 |
| (80,64)                                                     | S1     | 0.046   | 0.954 | 0.021 | 0.962 | 0.013 | 0.965 | 0.017   | 0.959 | 0.013 | 0.968 | 0.008 | 0.971 |
|                                                             | S2     | 0.039   | 0.957 | 0.024 | 0.960 | 0.014 | 0.966 | 0.016   | 0.960 | 0.012 | 0.969 | 0.008 | 0.972 |
|                                                             | S3     | 0.040   | 0.957 | 0.023 | 0.961 | 0.012 | 0.967 | 0.016   | 0.961 | 0.013 | 0.968 | 0.007 | 0.973 |
|                                                             | S4     | 0.046   | 0.955 | 0.025 | 0.962 | 0.011 | 0.968 | 0.018   | 0.960 | 0.011 | 0.970 | 0.007 | 0.972 |

Table S11: The ACLs ( $1^{st}$  column) and CPs ( $2^{nd}$  column) of 95% asymptotic and credible intervals of  $h(t)$  when  $\sigma = 0.8$ .

| $(T_1, T_2) \rightarrow$<br>$(n, m)$<br>Prior $\rightarrow$ | Scheme | (0.5,1) |       |       |       |       |       | (1.5,2) |       |       |       |       |       |
|-------------------------------------------------------------|--------|---------|-------|-------|-------|-------|-------|---------|-------|-------|-------|-------|-------|
|                                                             |        | ACI-NA  |       | BCI   |       |       |       | ACI-NA  |       | BCI   |       |       |       |
|                                                             |        |         |       | P1    |       | P2    |       |         |       | P1    |       | P2    |       |
| (40,20)                                                     | S1     | 0.623   | 0.925 | 0.535 | 0.931 | 0.190 | 0.951 | 0.478   | 0.938 | 0.359 | 0.946 | 0.183 | 0.952 |
|                                                             | S2     | 0.725   | 0.919 | 0.460 | 0.937 | 0.208 | 0.949 | 0.435   | 0.942 | 0.339 | 0.948 | 0.212 | 0.948 |
|                                                             | S3     | 0.515   | 0.937 | 0.473 | 0.936 | 0.232 | 0.946 | 0.429   | 0.943 | 0.372 | 0.943 | 0.228 | 0.947 |
|                                                             | S4     | 0.575   | 0.932 | 0.472 | 0.936 | 0.154 | 0.954 | 0.456   | 0.940 | 0.321 | 0.950 | 0.131 | 0.955 |
| (40,32)                                                     | S1     | 0.503   | 0.938 | 0.410 | 0.940 | 0.182 | 0.951 | 0.401   | 0.945 | 0.284 | 0.955 | 0.151 | 0.957 |
|                                                             | S2     | 0.522   | 0.936 | 0.375 | 0.945 | 0.162 | 0.953 | 0.347   | 0.954 | 0.311 | 0.953 | 0.140 | 0.958 |
|                                                             | S3     | 0.464   | 0.941 | 0.427 | 0.939 | 0.155 | 0.954 | 0.377   | 0.951 | 0.326 | 0.952 | 0.129 | 0.959 |
|                                                             | S4     | 0.518   | 0.937 | 0.375 | 0.945 | 0.146 | 0.956 | 0.361   | 0.952 | 0.262 | 0.957 | 0.124 | 0.960 |
| (80,40)                                                     | S1     | 0.441   | 0.941 | 0.378 | 0.945 | 0.119 | 0.959 | 0.287   | 0.963 | 0.248 | 0.959 | 0.091 | 0.963 |
|                                                             | S2     | 0.478   | 0.939 | 0.313 | 0.949 | 0.120 | 0.959 | 0.301   | 0.958 | 0.272 | 0.956 | 0.094 | 0.963 |
|                                                             | S3     | 0.358   | 0.949 | 0.308 | 0.950 | 0.102 | 0.962 | 0.297   | 0.962 | 0.266 | 0.957 | 0.083 | 0.965 |
|                                                             | S4     | 0.409   | 0.944 | 0.279 | 0.953 | 0.089 | 0.964 | 0.317   | 0.956 | 0.249 | 0.959 | 0.062 | 0.968 |
| (80,64)                                                     | S1     | 0.330   | 0.952 | 0.299 | 0.951 | 0.083 | 0.965 | 0.264   | 0.965 | 0.198 | 0.963 | 0.074 | 0.967 |
|                                                             | S2     | 0.359   | 0.949 | 0.284 | 0.952 | 0.095 | 0.963 | 0.266   | 0.964 | 0.215 | 0.961 | 0.082 | 0.965 |
|                                                             | S3     | 0.330   | 0.952 | 0.269 | 0.956 | 0.090 | 0.964 | 0.268   | 0.965 | 0.231 | 0.960 | 0.076 | 0.967 |
|                                                             | S4     | 0.369   | 0.948 | 0.266 | 0.957 | 0.059 | 0.969 | 0.257   | 0.966 | 0.213 | 0.961 | 0.054 | 0.971 |
|                                                             |        | ACI-NL  |       | HPD   |       |       |       | ACI-NL  |       | HPD   |       |       |       |
| (40,20)                                                     | S1     | 0.650   | 0.923 | 0.499 | 0.935 | 0.184 | 0.952 | 0.451   | 0.940 | 0.364 | 0.945 | 0.175 | 0.953 |
|                                                             | S2     | 0.663   | 0.922 | 0.435 | 0.940 | 0.201 | 0.950 | 0.443   | 0.941 | 0.340 | 0.948 | 0.197 | 0.950 |
|                                                             | S3     | 0.528   | 0.936 | 0.445 | 0.939 | 0.218 | 0.948 | 0.472   | 0.938 | 0.417 | 0.942 | 0.202 | 0.949 |
|                                                             | S4     | 0.594   | 0.930 | 0.444 | 0.939 | 0.150 | 0.955 | 0.465   | 0.939 | 0.371 | 0.944 | 0.146 | 0.956 |
| (40,32)                                                     | S1     | 0.517   | 0.937 | 0.386 | 0.942 | 0.175 | 0.954 | 0.379   | 0.948 | 0.306 | 0.955 | 0.168 | 0.954 |
|                                                             | S2     | 0.532   | 0.935 | 0.353 | 0.947 | 0.178 | 0.954 | 0.397   | 0.946 | 0.313 | 0.954 | 0.159 | 0.956 |
|                                                             | S3     | 0.475   | 0.940 | 0.402 | 0.941 | 0.188 | 0.953 | 0.432   | 0.941 | 0.382 | 0.950 | 0.163 | 0.955 |
|                                                             | S4     | 0.532   | 0.935 | 0.353 | 0.947 | 0.141 | 0.956 | 0.366   | 0.949 | 0.325 | 0.953 | 0.132 | 0.959 |
| (80,40)                                                     | S1     | 0.450   | 0.940 | 0.289 | 0.951 | 0.097 | 0.961 | 0.315   | 0.961 | 0.275 | 0.958 | 0.070 | 0.967 |
|                                                             | S2     | 0.436   | 0.942 | 0.286 | 0.951 | 0.089 | 0.962 | 0.301   | 0.958 | 0.271 | 0.959 | 0.082 | 0.966 |
|                                                             | S3     | 0.363   | 0.948 | 0.294 | 0.950 | 0.093 | 0.961 | 0.299   | 0.962 | 0.253 | 0.961 | 0.084 | 0.965 |
|                                                             | S4     | 0.416   | 0.943 | 0.272 | 0.953 | 0.079 | 0.965 | 0.320   | 0.955 | 0.243 | 0.962 | 0.066 | 0.968 |
| (80,64)                                                     | S1     | 0.334   | 0.952 | 0.275 | 0.953 | 0.086 | 0.965 | 0.264   | 0.965 | 0.239 | 0.963 | 0.063 | 0.969 |
|                                                             | S2     | 0.364   | 0.948 | 0.274 | 0.954 | 0.080 | 0.966 | 0.257   | 0.966 | 0.212 | 0.965 | 0.074 | 0.967 |
|                                                             | S3     | 0.334   | 0.952 | 0.285 | 0.951 | 0.081 | 0.966 | 0.270   | 0.964 | 0.234 | 0.963 | 0.080 | 0.967 |
|                                                             | S4     | 0.374   | 0.947 | 0.255 | 0.958 | 0.065 | 0.967 | 0.258   | 0.966 | 0.213 | 0.965 | 0.061 | 0.969 |

Table S12: The ACLs ( $1^{st}$  column) and CPs ( $2^{nd}$  column) of 95% asymptotic and credible intervals of  $h(t)$  when  $\sigma = 1.5$ .

| $(T_1, T_2) \rightarrow$<br>$(n, m)$<br>Prior $\rightarrow$ | Scheme | (0.5,1) |       |       |       |       |       | (1.5,2) |       |       |       |       |       |
|-------------------------------------------------------------|--------|---------|-------|-------|-------|-------|-------|---------|-------|-------|-------|-------|-------|
|                                                             |        | ACI-NA  |       | BCI   |       |       |       | ACI-NA  |       | BCI   |       |       |       |
|                                                             |        |         |       | P1    |       | P2    |       |         |       | P1    |       | P2    |       |
| (40,20)                                                     | S1     | 0.435   | 0.924 | 0.135 | 0.946 | 0.048 | 0.967 | 0.170   | 0.941 | 0.123 | 0.948 | 0.047 | 0.968 |
|                                                             | S2     | 0.365   | 0.936 | 0.138 | 0.946 | 0.058 | 0.965 | 0.188   | 0.939 | 0.133 | 0.950 | 0.057 | 0.965 |
|                                                             | S3     | 0.330   | 0.941 | 0.132 | 0.947 | 0.064 | 0.964 | 0.167   | 0.942 | 0.139 | 0.946 | 0.059 | 0.966 |
|                                                             | S4     | 0.351   | 0.938 | 0.129 | 0.948 | 0.080 | 0.962 | 0.162   | 0.942 | 0.127 | 0.949 | 0.077 | 0.964 |
| (40,32)                                                     | S1     | 0.347   | 0.939 | 0.111 | 0.954 | 0.041 | 0.970 | 0.137   | 0.945 | 0.115 | 0.953 | 0.042 | 0.970 |
|                                                             | S2     | 0.299   | 0.946 | 0.108 | 0.956 | 0.049 | 0.968 | 0.138   | 0.945 | 0.116 | 0.953 | 0.040 | 0.972 |
|                                                             | S3     | 0.297   | 0.946 | 0.104 | 0.956 | 0.057 | 0.967 | 0.142   | 0.943 | 0.110 | 0.952 | 0.051 | 0.967 |
|                                                             | S4     | 0.339   | 0.940 | 0.106 | 0.955 | 0.075 | 0.964 | 0.139   | 0.945 | 0.107 | 0.955 | 0.071 | 0.966 |
| (80,40)                                                     | S1     | 0.305   | 0.946 | 0.090 | 0.959 | 0.039 | 0.971 | 0.118   | 0.947 | 0.103 | 0.958 | 0.039 | 0.971 |
|                                                             | S2     | 0.247   | 0.952 | 0.088 | 0.960 | 0.042 | 0.970 | 0.121   | 0.948 | 0.101 | 0.959 | 0.033 | 0.972 |
|                                                             | S3     | 0.256   | 0.951 | 0.089 | 0.959 | 0.047 | 0.968 | 0.114   | 0.950 | 0.099 | 0.960 | 0.046 | 0.968 |
|                                                             | S4     | 0.271   | 0.948 | 0.089 | 0.960 | 0.054 | 0.966 | 0.112   | 0.950 | 0.099 | 0.960 | 0.042 | 0.969 |
| (80,64)                                                     | S1     | 0.244   | 0.953 | 0.089 | 0.960 | 0.028 | 0.977 | 0.095   | 0.951 | 0.086 | 0.961 | 0.022 | 0.977 |
|                                                             | S2     | 0.211   | 0.958 | 0.082 | 0.962 | 0.024 | 0.979 | 0.097   | 0.951 | 0.082 | 0.964 | 0.023 | 0.979 |
|                                                             | S3     | 0.218   | 0.957 | 0.076 | 0.963 | 0.031 | 0.976 | 0.082   | 0.953 | 0.078 | 0.965 | 0.029 | 0.978 |
|                                                             | S4     | 0.239   | 0.954 | 0.085 | 0.961 | 0.048 | 0.967 | 0.097   | 0.951 | 0.085 | 0.962 | 0.035 | 0.969 |
|                                                             |        | ACI-NL  |       | HPD   |       |       |       | ACI-NL  |       | HPD   |       |       |       |
| (40,20)                                                     | S1     | 0.488   | 0.921 | 0.129 | 0.949 | 0.047 | 0.969 | 0.172   | 0.941 | 0.116 | 0.951 | 0.046 | 0.969 |
|                                                             | S2     | 0.391   | 0.933 | 0.117 | 0.949 | 0.056 | 0.967 | 0.191   | 0.939 | 0.107 | 0.953 | 0.055 | 0.965 |
|                                                             | S3     | 0.372   | 0.938 | 0.111 | 0.951 | 0.062 | 0.966 | 0.176   | 0.940 | 0.118 | 0.950 | 0.058 | 0.967 |
|                                                             | S4     | 0.385   | 0.936 | 0.115 | 0.950 | 0.071 | 0.964 | 0.164   | 0.942 | 0.105 | 0.953 | 0.054 | 0.965 |
| (40,32)                                                     | S1     | 0.373   | 0.937 | 0.105 | 0.957 | 0.035 | 0.972 | 0.138   | 0.945 | 0.099 | 0.956 | 0.035 | 0.971 |
|                                                             | S2     | 0.316   | 0.944 | 0.098 | 0.959 | 0.042 | 0.970 | 0.139   | 0.945 | 0.101 | 0.956 | 0.042 | 0.969 |
|                                                             | S3     | 0.313   | 0.944 | 0.098 | 0.959 | 0.056 | 0.968 | 0.144   | 0.943 | 0.104 | 0.955 | 0.053 | 0.969 |
|                                                             | S4     | 0.361   | 0.938 | 0.100 | 0.958 | 0.067 | 0.966 | 0.140   | 0.945 | 0.101 | 0.956 | 0.041 | 0.969 |
| (80,40)                                                     | S1     | 0.322   | 0.945 | 0.093 | 0.961 | 0.027 | 0.974 | 0.119   | 0.947 | 0.088 | 0.961 | 0.022 | 0.972 |
|                                                             | S2     | 0.256   | 0.951 | 0.087 | 0.963 | 0.030 | 0.973 | 0.123   | 0.946 | 0.088 | 0.961 | 0.026 | 0.973 |
|                                                             | S3     | 0.277   | 0.948 | 0.089 | 0.962 | 0.030 | 0.973 | 0.129   | 0.949 | 0.086 | 0.963 | 0.020 | 0.973 |
|                                                             | S4     | 0.249   | 0.950 | 0.088 | 0.963 | 0.031 | 0.969 | 0.112   | 0.950 | 0.087 | 0.962 | 0.028 | 0.971 |
| (80,64)                                                     | S1     | 0.253   | 0.952 | 0.082 | 0.963 | 0.017 | 0.979 | 0.096   | 0.951 | 0.085 | 0.964 | 0.016 | 0.978 |
|                                                             | S2     | 0.217   | 0.957 | 0.081 | 0.965 | 0.022 | 0.980 | 0.097   | 0.951 | 0.081 | 0.967 | 0.020 | 0.975 |
|                                                             | S3     | 0.216   | 0.957 | 0.075 | 0.966 | 0.019 | 0.978 | 0.083   | 0.953 | 0.079 | 0.968 | 0.018 | 0.976 |
|                                                             | S4     | 0.205   | 0.958 | 0.081 | 0.965 | 0.021 | 0.980 | 0.098   | 0.951 | 0.084 | 0.964 | 0.018 | 0.976 |
